# Supplementary material for: Angiopoietin-2 Inhibition of Thrombomodulin-Mediated Anticoagulation—A Novel Mechanism That May Contribute to Hypercoagulation in Critically Ill COVID-19 Patients
Source: MDPI journal article supplement (doi:10.3390/biomedicines10061333), 2022-06-06
Supplement: s1 [file s1]

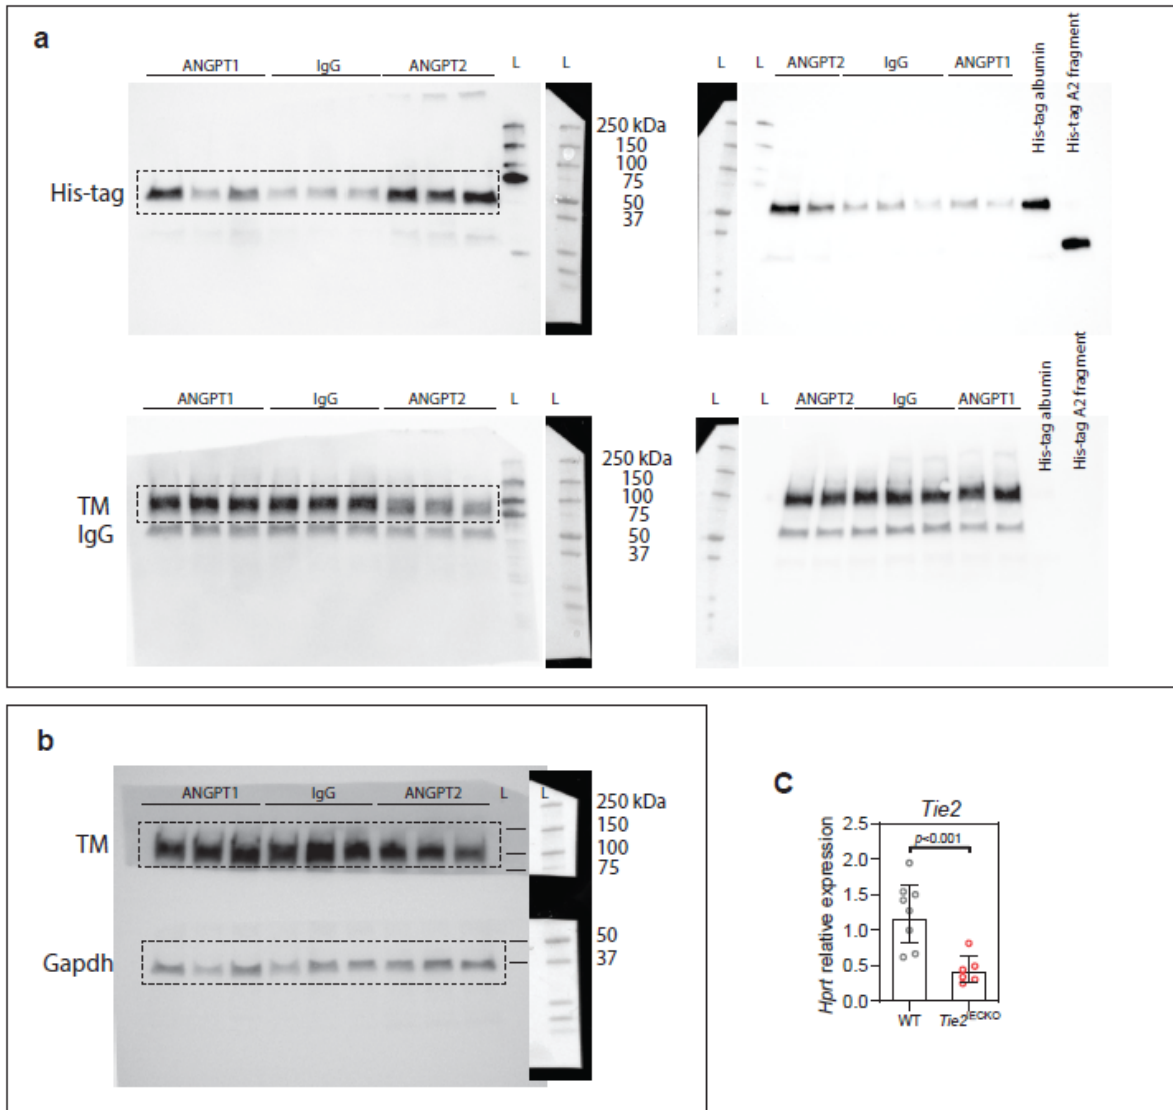

**Figure S1.** (a) Full gel blots of His-tag labelled proteins after immunoprecipitation of TM in lung tissue 15 min after intraperitoneal (i.p.) injection of 80 nmol (high dose) of His-tagged ANGPT2 (A2), ANGPT1 (A1) and IgG. (b) Full gel blot of total TM in lung lysates from the same conditions as above. (c) Gene expression of *Tie2* in kidney lysates in *Tie2*<sup>IECKO</sup> mice and littermate controls (WT). Data presented as mean ± 95% CI, statistical comparison with Student's t-test.

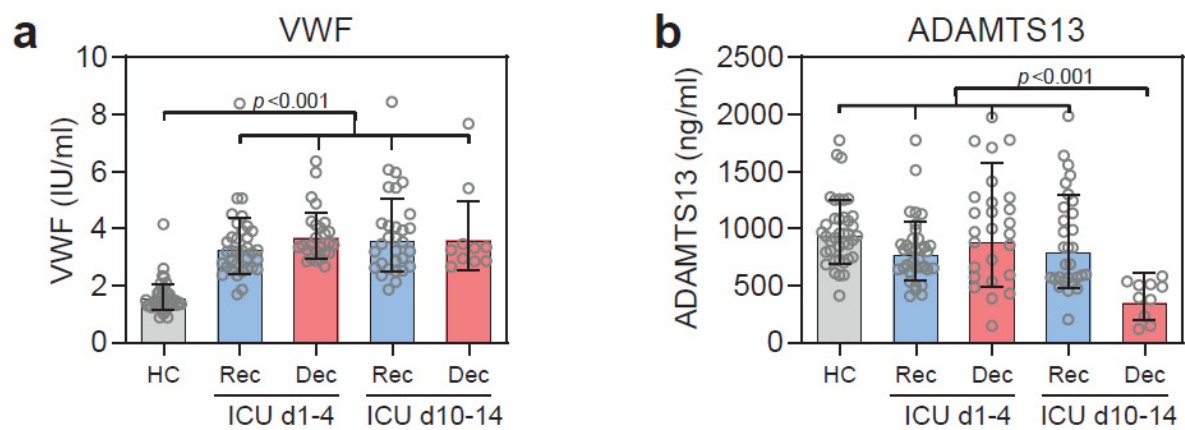

**Figure S2.** (a,b) Plasma VWF and ADAMTS13 concentrations for healthy controls (HC), recovered (Rec) and deceased (Dec) patients at day 1-4 and day 10-14 after admission, respectively. Data presented as mean  $\pm$  95% CI. Statistical comparison from one-way ANOVA with Bonferroni post hoc.
